# Supplementary material for: Conformational change in the thiazole and oxazoline containing cyclic octapeptides, the patellamides. Part 1. Cu2+ and Zn2+ induced conformational changeElectronic supplementary information (ESI) available: further calculational details. See http://www.rsc.org/suppdata/p2/b2/b201823n/
Source: Royal Society of Chemistry journal article supplement (doi:10.1039/b201823n), 2002-04-24
Supplement: b201823n.doc [file b201823n.doc]

# Supplementary data

**“Conformational Change in the Thiazole and Oxazoline Containing Cyclic Octapeptides, the Patellamides. Part I: Cu2+ Induced Conformational Change.”**

Linda A. Morris, Bruce F. Milne, Gary S. Thompson and Marcel Jaspars*

**Calculation of structures**

NOEs were obtained using a T-ROESY pulse sequence with a 400 ms mixing time. In the case of the Cu complex of patellamide C, selective 1D NOESY’s were acquired by creating a shaped pulse at the desired resonance frequency and incorporating this into the 1D NOESY pulse sequence using 75 ms and 400 ms mixing times. NOE’s were classified into weak (1.8 - 5.0 Å), medium (1.8 - 3.5 Å) and strong (1.8 - 2.5 Å) categories. Molecular dynamics calculation were carried out using XPLOR 3.8511, modified for swapping of prochiral groups. Throughout the calculations a forcefield with purely repulsive non bonded interaction terms (REPEL) was used, with no electrostatic potential being applied. The incorporation of the cyclic amino acids Xxx(Thz) and Yyy(Oxn) and the closure of the ring was achieved by a series of patches to the standard XPLOR parameter and topology files for NMR structures. These patches included improper terms to keep the thiazole residue flat. Circular template structures with good geometry were defined, annealed at 300 K, minimised, and checked for the correct chirality and the geometry of the residues1. These template structures were then used in the structure calculations.

Structure calculation used an *ab initio* simulated annealing strategy (YASAP 3.02,3. Sum averaging4 was used for all methyl, methylene, and aromatic ring atom pairs. Assignment of prochiral groups was achieved by floating assignment and swapping of prochiral groups5,6. A reduced set of non-bonded interactions and a reduced representation of the amino acid side chains was used during the conformation search phase7. During all stages of the simulated annealing calculation the temperature was maintained by coupling to a heat bath8 with a coupling frequency of 10 ps-1. 100 initial starting structures were calculated by randomisation of the backbone  and  angles using an elastic bond between 8 Thr C and 1 Val N to relieve strain. The simulated annealing protocol was divided into four stages:

1. 60 ms of annealing at a temperature of 2000 K with a timestep of 2 fs during which the force constants for the distance restraints were increased to their final value in 5 steps. This stage of the calculation used the reduced sidechain representation consisting of a 2.25 Å radius C atom.

2. cooling from 2000 to 1000 K over 40 ps during which force constants for non bonded interactions were increased to their final value.

3. cooling from 1000K to 100 K over 20 ps with a time step of 1 fs.

4. 200 steps of minimisation.

In all cases the lengths of restraints for methyl residues was extended by 0.5 Å to allow for the differential relaxation of methyls. A soft potential was used in the *ab initio* simulated annealing protocol for the distance restraints.

During the refinement stage the 30 lowest energy structures from each ensemble were refined by a single round of simulated annealing with slow cooling. The high temperature step consisted of 600 ps of cooling from 1500 K to 100 K with a timestep of 3 fs followed 4000 rounds of minimisation. A square well potential was used for the distance restraint function. Clusters of 18 and 38 low energy structures with the similar backbone geometry were selected to represent the final structures of the Cu bound patellamide C and Zn bound patellamide C respectively.

Calculations were carried out on a SGI Origin2000 computer. The overlay and display of structures was achieved using Molmol.9.

**Table 1** NOE restraints for patellamide C + 1 equivalent Cu(II) in CD3OD

| **Residue i** | **Atom i** | **Residue j** | **Atom j** | **Upper bound Å** | **Bin (s, m, w)** |
| --- | --- | --- | --- | --- | --- |
| 1 | HB# | 1 | HD# | 5.500 | w |
| 1 | HE# | 1 | HB# | 5.500 | w |
| 1 | HB# | 2 | HB1 | 5.500 | w |
| 1 | HB# | 7 | HG1# | 5.500 | w |
| 1 | HB# | 8 | HA | 5.500 | w |
| 1 | HB# | 8 | HB | 5.500 | w |
| 1 | HB# | 8 | HG2# | 6.000 | w |
| 2 | HB1 | 3 | HG2# | 6.000 | w |
| 3 | HA | 3 | HG1# | 4.500 | m |
| 3 | HG2# | 3 | HA | 6.000 | w |
| 3 | HA | 4 | HA | 5.500 | w |
| 3 | HA | 4 | HG2# | 6.000 | w |
| 3 | HG1# | 4 | HA | 6.000 | w |
| 3 | HG1# | 4 | HB | 4.000 | m |
| 3 | HA | 5 | HA | 5.500 | w |
| 3 | HG1# | 5 | HA | 4.500 | m |
| 3 | HG##a | 4 | HG2# | 6.500 | w |
| 4 | HA | 4 | HB | 5.500 | w |
| 4 | HG2# | 4 | HB | 6.000 | w |
| 4 | HB | 5 | HA | 5.500 | w |
| 4 | HB | 5 | HB# | 5.500 | w |
| 6 | HB1 | 7 | HA | 5.500 | w |
| 7 | HD1# | 7 | HA | 6.000 | w |
| 7 | HA | 8 | HB | 5.500 | w |
| 7 | HD1# | 8 | HB | 6.000 | w |
| 7 | HG2# | 8 | HB | 4.000 | m |
| a The chemical shifts of 3HG1# and 3HG2# were extremely close and in some cases the NOE could not be assigned to either due to the broadness of the NOE. In these cases the assignment of 3HG## has been used which prevents floating assignment and swapping of these prochiral methyls. | | | | | |

**Table 2.** Statistical data for a cluster of 18 low energy structures of patellamide C with 1 eq of Cu(II) in CD3OD. Structures were overlaid using all heavy backbone atoms.

**Global mean (backbone) RMSD: 0.00 ± 0.00 Å**

**Global mean (heavy atoms) RMSD: 0.79 ± 0.36 Å**

| **Residue name** | **Average global displacements (Å)** | | **3 Residue Average local RMSD (Å)** | **Average local  displacements (Å)** | |
| --- | --- | --- | --- | --- | --- |
|  | **backbone** | **heavy atoms** | **backbone** | **backbone** | **heavy atoms** |
| **1** Phe | 0.00 | 1.28 | 0.00 | 0.00 | 0.00 |
| **2** Cys | 0.00 | 0.00 | 0.00 | 0.00 | 0.00 |
| **3** Val | 0.00 | 0.00 | 0.00 | 0.00 | 0.08 |
| **4** Thr | 0.00 | 0.06 | 0.00 | 0.00 | 0.05 |
| **5** Ala | 0.00 | 0.00 | 0.00 | 0.00 | 0.04 |
| **6** Cys | 0.00 | 0.00 | 0.00 | 0.00 | 0.03 |
| **7** Ile | 0.00 | 0.30 | 0.00 | 0.00 | 0.39 |
| **8** Thr | 0.00 | 0.00 | 0.00 | 0.00 | 0.00 |

**Table 3.** Energies (kcal mol-1) for the lowest energy conformation of patellamide C with 1 eq of Cu(II) in CD3OD

|  | **overall** | **bonds** | **angles** | **improper  torsions** | **van der Waals** | **NOE** |
| --- | --- | --- | --- | --- | --- | --- |
|  | 23.35 | 2.58 | 16.04 | 2.52 | 1.2610-2 | 2.19 |
| RMSD |  | 4.9710-3 | 0.76 | 0.44 | - | 3.9510-2 |

NOE violations ( > 0.15Å) 1

**Table 4.** NOE Violations for the low energy ensemble of 18 structures of patellamide C with 1 eq of Cu(II) in CD3OD

| **Atom i** | **Atom j** | **rav Å** | **NOE Å** | **Delta Å average / max** | **No violations** | **Enoe kcal mol-1** |
| --- | --- | --- | --- | --- | --- | --- |
| VAL 3 HA | ALA 5 HA | 5.70 | 0.00 - 5.50 | -0.20 / -0.21 | 18 | 0.21 |

**Table 5 NOE restraints for patellamide C + 2 equivalents of Zn(II) in CD3OD**

| **Residue i** | **Atom i** | **Residue j** | **Atom j** | **Upper Bound Å** | **Bin (w, m, s)** |
| --- | --- | --- | --- | --- | --- |
| 1 | HA | 1 | HB# | 2.500 | s |
| 1 | HA | 1 | HD# | 5.500 | w |
| 1 | HB# | 1 | HD# | 2.500 | s |
| 1 | HB# | 1 | HE# | 5.000 | w |
| 1 | HB# | 3 | HG2# | 5.500 | w |
| 1 | HB# | 6 | HB1 | 5.000 | w |
| 2 | HB1 | 5 | HB# | 5.500 | w |
| 3 | HA | 3 | HG2# | 4.000 | m |
| 3 | HG1# | 4 | HG2# | 4.500 | m |
| 3 | HG2# | 7 | HB | 5.500 | w |
| 3 | HG2# | 8 | HB | 6.000 | w |
| 3 | HG2# | 8 | HG2# | 5.500 | w |
| 4 | HA | 4 | HB | 3.500 | m |
| 4 | HA | 4 | HG2# | 3.000 | s |
| 4 | HB | 4 | HG2# | 3.000 | s |
| 5 | HA | 5 | HB# | 3.000 | s |
| 5 | HA | 7 | HD1# | 5.500 | w |
| 5 | HB# | 7 | HB | 5.500 | w |
| 5 | HB# | 7 | HD1# | 5.500 | w |
| 5 | HB# | 8 | HG2# | 6.000 | w |
| 7 | HA | 7 | HG2# | 4.000 | m |
| 7 | HB | 8 | HG2# | 6.000 | w |
| 8 | HA | 8 | HB | 3.500 | m |
| 8 | HA | 8 | HG2# | 3.000 | s |
| 8 | HB | 8 | HG2# | 3.000 | s |

**Table 6.** Statistical data for the 38 lowest energy structures of patellamide C with 2 eq Zn(II) in CD3OD

**Global mean (backbone) RMSD: 0.00 ± 0.00 Å**

**Global mean (heavy atoms) RMSD: 0.47 ± 0.21 Å**

| **Residue name** | **Average global displacements (Å)** | | **3 Residue Average local RMSD (Å)** | **Average local  displacements (Å)** | |
| --- | --- | --- | --- | --- | --- |
|  | **backbone** | **heavy atoms** | **backbone** | **backbone** | **heavy atoms** |
| **1** Phe | 0.00 | 0.77 | 0.00 | 0.00 | 0.00 |
| **2** Cys | 0.00 | 0.00 | 0.00 | 0.00 | 0.00 |
| **3** Val | 0.00 | 0.39 | 0.00 | 0.00 | 0.39 |
| **4** Thr | 0.00 | 0.00 | 0.00 | 0.00 | 0.00 |
| **5** Ala | 0.00 | 0.00 | 0.00 | 0.00 | 0.00 |
| **6** Cys | 0.00 | 0.00 | 0.00 | 0.00 | 0.00 |
| **7** Ile | 0.00 | 0.03 | 0.00 | 0.00 | 0.03 |
| **8** Thr | 0.00 | 0.00 | 0.00 | 0.00 | 0.00 |

**Table 7. Energies (kcal mol-1) for the lowest energy conformation of patellamide C with 2 eq Zn(II) in CD3OD**

|  | **overall** | **bonds** | **angles** | **improper  torsions** | **van der  Waals** | **NOE** |
| --- | --- | --- | --- | --- | --- | --- |
|  | 28.43 | 2.80 | 18.44 | 4.02 | 4.6510-4 | 3.16 |
| RMSD |  | 5.1910-3 | 0.82 | 0.55 | - | 5.0210-2 |

NOE violations ( > 0.15Å) 1

**Table 8.** Noe violations > 0.15Å for patellamide C with 2 eq Zn(II) in CD3OD

| **Atom i** | **Atom j** | **rav Å** | **NOE Å** | **Delta Å average / max** | **No violations** | **Enoe kcal mol-1** |
| --- | --- | --- | --- | --- | --- | --- |
| ALA 5 HB# | THR 8 HG2# | 6.20 | 0.00 - 6.00 | -0.20/-0.20 | 38 | 2.01 |

**Table 9. Restraints imposed on patellamide C structure to simulate single copper complex geometry during Monte-Carlo conformational search.**

| Type | Residue(s) | Atoms | Value | ForceConstant  (KJ mol-1 Å-2) |
| --- | --- | --- | --- | --- |
| torsion | 6-7 | 6N-6CA-6CO-7N | 0o | 1000 |
| torsion | 6-7 | 6CA-6CO-7N-7CA | 180 o | 1000 |
| torsion | 6-7 | 6CO-7N-7CA-7CO | 180 o | 1000 |
| torsion | 7-8 | 7N-7CA-7CO-8N | 0 o | 1000 |
| torsion | 2-3 | 2N-2CA-2CO-3N | 0 o | 1000 |
|  |  |  |  |  |
| distancea | 6-7 | 6N-7N | 2.6 Å | 2500 |
| distancea | 6-8 | 6N-8N | 4.0 Å | 1000 |
| distancea | 7-8 | 7N-8N | 2.6 Å | 1500 |
| a Force constants for torsional restraints are default Macromodel values but those for the distance restraints were found by trial and error. | | | | |

**References**

(1) Brünger, A. T. X-PLOR A system for X-ray crystallography and NMR 3..851.; Yale University: New Haven, 1993.

(2) Nilges, M.; Gronenborn, A. M.; Brünger, A. T.; Clore, G. M. *Prot. Engng.* **1988**, *2*, 27-38.

(3) Nilges, M.; Kuszewski, J.; Brünger, A. T. In *Computational Aspects of the Study of Biological Macromolecules by Nuclear Magnetic Resonance*; Hoch, J. C., Poulsen, F. M., Redfield, C., Eds.; Plenum Press: New York, 1991; Vol. Vol 225, pp 451-455.

(4) Brünger, A. T.; Clore, G. M.; Gronenborn, A. M.; Karplus, M. *Proc. Natl. Acad. Sci. U.S.A.* **1986**, *83*, 3801-3805.

(5) Holak, T. A.; Nilges, M.; Oschkinat, H. *FEBS Lett.* **1989**, *242*, 218-224.

(6) Folmer, R. H. A.; Hilbers, C. W.; Konings, R. N. H.; Nilges, M. *J. Biomol NMR* **1997**, *9*, 245-258.

(7) Nilges, M. *Proteins: Struct. Funct. and Genet.* **1993**, *17*, 297-309.

(8) Berendsen, H. J. C.; Postma, J. P. M.; van Gunsteren, W. F.; DiNicola, A.; J.R., H. *J. Chem. Phys.* **1984**,  *81*, 3684-3690.

(9) Koradi, R. M. B.; Wuthrich, K. *J. Mol. Graph.* **1994**, *14*, 51-59.
